# Supplementary material for: S-nitrosylation of SlAPX Is Involved in Alleviating Oxidative Damage in Transgenic Tobacco under Nitrate Stress
Source: MDPI journal article supplement (doi:10.3390/agronomy13051322), 2023-05-09
Supplement: s1 [file s1]

**Table S1.** Specific primers for qRT-PCR amplification.

| Genes            | GenBank accession number | Forward primer (5'→3')  | Reverse primer (5'→3')  |
|------------------|--------------------------|-------------------------|-------------------------|
| <i>SlACTIN</i>   | NM_001308447             | TGGTCGGAATGGGACAGAAG    | CTCAGTCAGGAGAACAGGGT    |
| <i>SlAPX1</i>    | NM_001247853             | TTCTCCAGCTGGTACTTTGAT   | GAAGTGCATAACTTCCCATCT   |
| <i>NtACTIN</i>   | BAD27408                 | GCTTGCTTACATTGCTCTC     | TGTGGAGAAGAACTATGAGC    |
| <i>NtOsmotin</i> | X61679                   | GTAACCTCAATGCTGCTGGTAGG | CAAAGCGTATTTCAGCCAAGGTG |
| <i>NtP5CS</i>    | HM854026                 | GACACGGACTGATGGAAGATTA  | GCACCTGAAGTCACCAGAATAA  |
| <i>NtDREB2</i>   | EU727156                 | GAAACGCCAGAAAGTAGT      | ATTAGTCCTTCCGCCATA      |
| <i>NtLEA5</i>    | AF053076                 | GTTACCATAACCACGTCCCATAG | GAGCTAGGACGCTCCATATTT   |

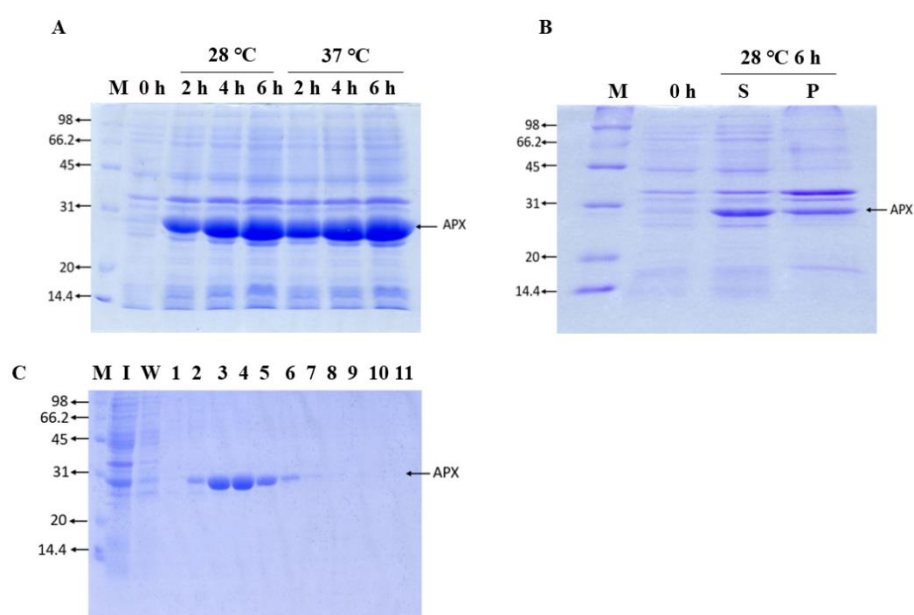

**Figure S1.** Induction and purification of tomato SlAPX recombinant protein prokaryotically. A: SDS-PAGE analysis of the recombinant tomato SlAPX proteins. M: protein marker. Protein expression collected at 0, 2, 4, 6 h post induction in *Escherichia coli* with 1 mM IPTG at 28 °C or 37 °C. B: SDS-PAGE analysis of the recombinant tomato SlAPX proteins of the supernatant (S) or precipitated (P) protein collected at 6 h post induction with 1 mM IPTG at 28 °C. C: Purification of the SlAPX protein. I: flow-through liquid. W: wash buffer. The protein was eluted in 1 mL fractions using a discontinuous gradient of imidazole prepared in the same buffer with 100 mM NaCl and 10, 50, 100, 150, 200, 250, 300, 350, 400, 450, 500 mM imidazole, respectively (1-11).
